# Supplementary material
Source: HighWire-hosted journal article supplement (https://www.cancerbiomed.org/content/18/2/490)
Supplement: media-1 [file media-1.pdf]

# Supplementary materials

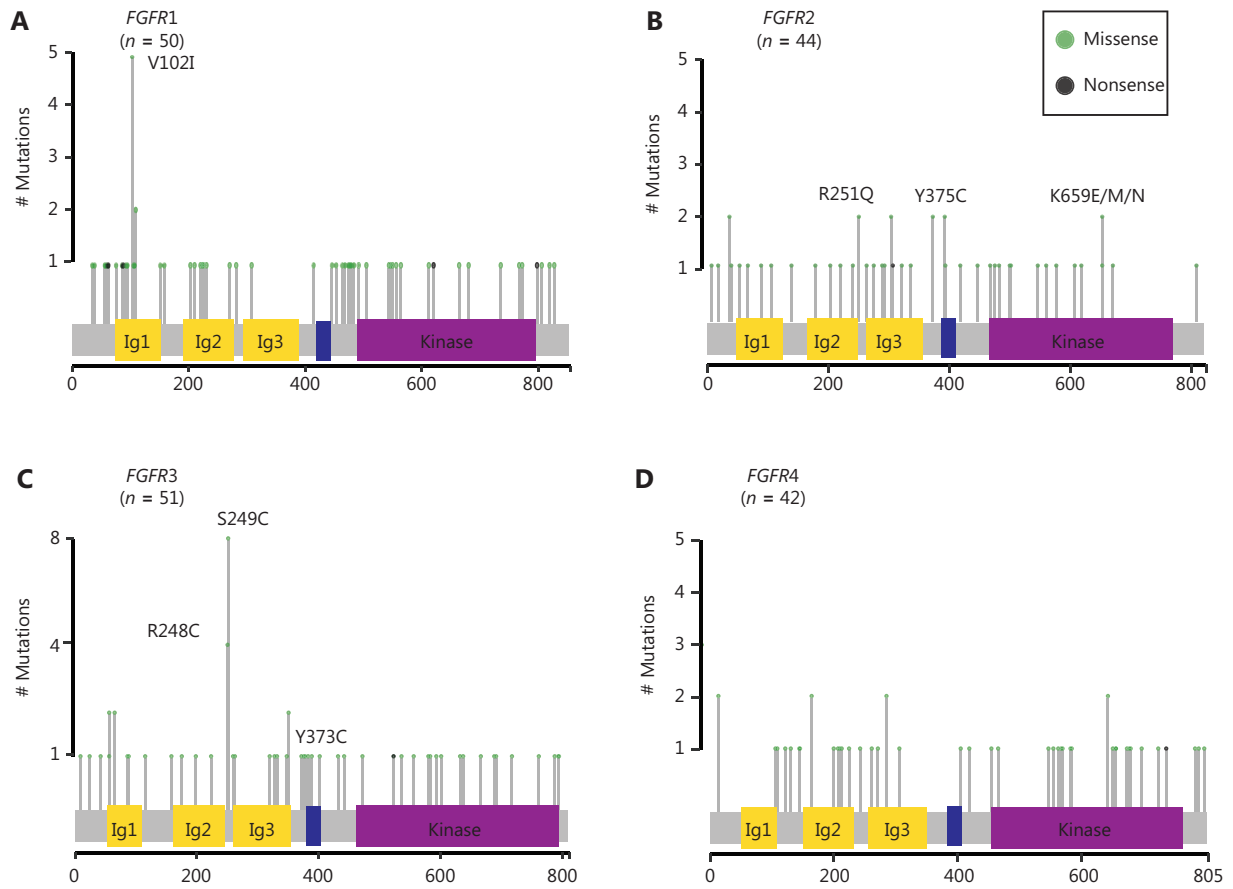

**Figure S1** Distribution of all *FGFR* mutations identified in the Chinese NSCLC population.

**Table S1** List of *FGFR1-4* oncogenic and likely oncogenic mutations according to OncoKB annotations

| FGFR1 | FGFR2        | FGFR3 | FGFR4 |
|-------|--------------|-------|-------|
| K687E | A648T        | A391E | D127H |
| N577K | C382R        | D641G | N535K |
| V592M | D101Y        | D641N | V550E |
|       | D530N        | G370C | Y367C |
|       | E219K        | G375C |       |
|       | E565G        | G380R |       |
|       | E731K        | G382D |       |
|       | F276C        | I538V |       |
|       | G271E        | K650E |       |
|       | I547V        | K650M |       |
|       | I642V        | K650N |       |
|       | K525E        | K650Q |       |
|       | K526E        | K650R |       |
|       | K641N        | K650T |       |
|       | K641R        | M528I |       |
|       | K659E        | N540K |       |
|       | K659N        | N540S |       |
|       | L617F        | R248C |       |
|       | L617M        | R669G |       |
|       | M391R        | S249C |       |
|       | M535I        | S371C |       |
|       | M537I        | V555M |       |
|       | N549H        | Y373C |       |
|       | N549K        | Y647C |       |
|       | N549S        |       |       |
|       | N549T        |       |       |
|       | P253R        |       |       |
|       | R203C        |       |       |
|       | R251Q        |       |       |
|       | R678G        |       |       |
|       | S252W        |       |       |
|       | S267_D273dup |       |       |
|       | T341P        |       |       |
|       | V564F        |       |       |
|       | V564I        |       |       |

Continued

| FGFR1 | FGFR2            | FGFR3 | FGFR4 |
|-------|------------------|-------|-------|
|       | W290R            |       |       |
|       | W290_I291delinsC |       |       |
|       | Y375C            |       |       |
|       | Y381D            |       |       |
